# The Anesthesiologist's Bookshelf

Edited by HUBERTA M. LIVINGSTONE, M.D.

**Hyperbaric Oxygenation.** By CHARLES B. PITTINGER, M.D., Professor and Chairman, Department of Anesthesiology, Vanderbilt University School of Medicine, Nashville, Tenn. Cloth. \$5.50. Pp. 113. Charles C Thomas, Springfield, Ill., 1966.

As the author states, "This monograph has been prepared to provide a concise introduction to the various aspects of hyperbaric oxygenation. The scope is broad. . . ." Toward the end he summarizes well, stating that "Critical appraisal of clinical accomplishments with hyperbaric oxygenation are wanting. . . . In addition to establishing current clinical uses of hyperbaric oxygenation upon a firmer scientific basis, the desire to extend its application into new areas is recognized. A rational basis of therapy is essential in all instances. The harm which may result from imprudent administration of hyperbaric therapy is historically documented."

The book has 16 short chapters which deal with two phases of the material. The first five are concerned with fundamental physiology. These present clear summary statements of the current status of the subject, and are replete with references to details. The latter part of the book is similarly arranged with regard to clinical applications of hyperbaric oxygenation. There is both an author and a subject index.

The author has given anesthesia under hyperbaric conditions, so has had experience in the fundamental knowledge required in the field. His style is easily read, and makes an excellent takeoff point for anyone wanting to enter this field.

ROBERT W. VIRTUE, M.D.

**Animal Anaesthesia: Volume II, General Anaesthesia.** By MELCHIOR WESTHUES, Professor and Director of the Department of Veterinary Surgery, AND RUDOLF FRITSCH, D.V.M. Anaesthetist at the Department of Veterinary Surgery, University of Munich. It is translated from the German by A. D. Weaver. Cloth. \$18.00. Pp. 458, with 70 illustrations. J. B. Lippincott Co., Philadelphia, 1966.

The book is a translation of *Die Narkose der Tiere*, Volume II. *Allgemeinnarkose*, published in 1961 by Paul Parey, Berlin, Germany. It de-

scribes in detail the principles and techniques of general anesthesia in animals. Volume I dealt with local anesthetic techniques. These two volumes are the most complete documentation of animal anesthetic techniques available.

Volume II is divided into four parts: (1) Principles of Anaesthesia, (2) Drugs Employed in Anaesthesia, (3) Techniques of Anaesthesia, and (4) Application of Anaesthesia to Different Species. Each part is further subdivided into chapters. Techniques for anesthetizing all common domestic and laboratory animals with various agents are described. In addition, chapters are included on wild and zoo animals, and birds.

Numerous illustrations accompany the text, some of which are outdated. An extensive bibliography is presented but is poorly correlated with the context of the book. These are minor considerations however, in what is otherwise an outstanding work.

This book should be of interest to all persons engaged in anesthesia research or to those who have reason to employ general anesthesia in animals.

WILLIAM V. LUMB, D.V.M., Ph.D.

**Atlas of Pediatric Surgery.** EDITED BY ROBERT R. WHITE, M.D., F.A.C.S., F.A.A.P., Clinical Professor of Surgery (Pediatric Surgery), The University of Rochester School of Medicine and Dentistry. Cloth. \$30.00. Pp. 946, with 344 illustrations. The Blakiston Division, McGraw-Hill Book Company, New York, Toronto, Sydney, London, 1965.

Events occurring during the formative years often exert a profound influence on the young doctor. Such apparently was the case in the life of the editor of this book. During Dr. White's residencies, at the Peter Bent Brigham Hospital and at the Children's Hospital, Boston, his preceptors published two books which have become classics. Cutler and Zollinger published *Atlas of Surgical Operations* and Ladd and Gross published *Abdominal Surgery of Infancy and Childhood*. Now, the two decades of Dr. White's medical experiences have culminated in the publication of his *Atlas of Pediatric Surgery*, which may well join the classical medical literature of our generation.

In order to make available in one volume, not only general pediatric surgical procedures, but
